# Supplementary material
Source: PubMed Central journal article supplement (PMC6544858)
Supplement: supp_RA118.006508_141674_2_supp_308629_pp8b8x.pdf [file supp_RA118.006508_141674_2_supp_308629_pp8b8x.pdf]

C5aR2 contributes to NLRP3 inflammasome activation and HMGB1 release via promoting PKR expression in macrophages

Songlin Yu<sup>1,2#</sup>, Dan Wang<sup>1#</sup>, Lingmin Huang<sup>1</sup>, Yening Zhang<sup>1</sup>, Ruiheng Luo<sup>1</sup>, Dickson Adah<sup>3,4</sup>, Yiting Tang<sup>5</sup>, Kai Zhao<sup>1\*</sup>, Ben Lu<sup>1,6,7,8\*</sup>

This supporting file contains revised supplementary figures 1-5 and legends as follows.

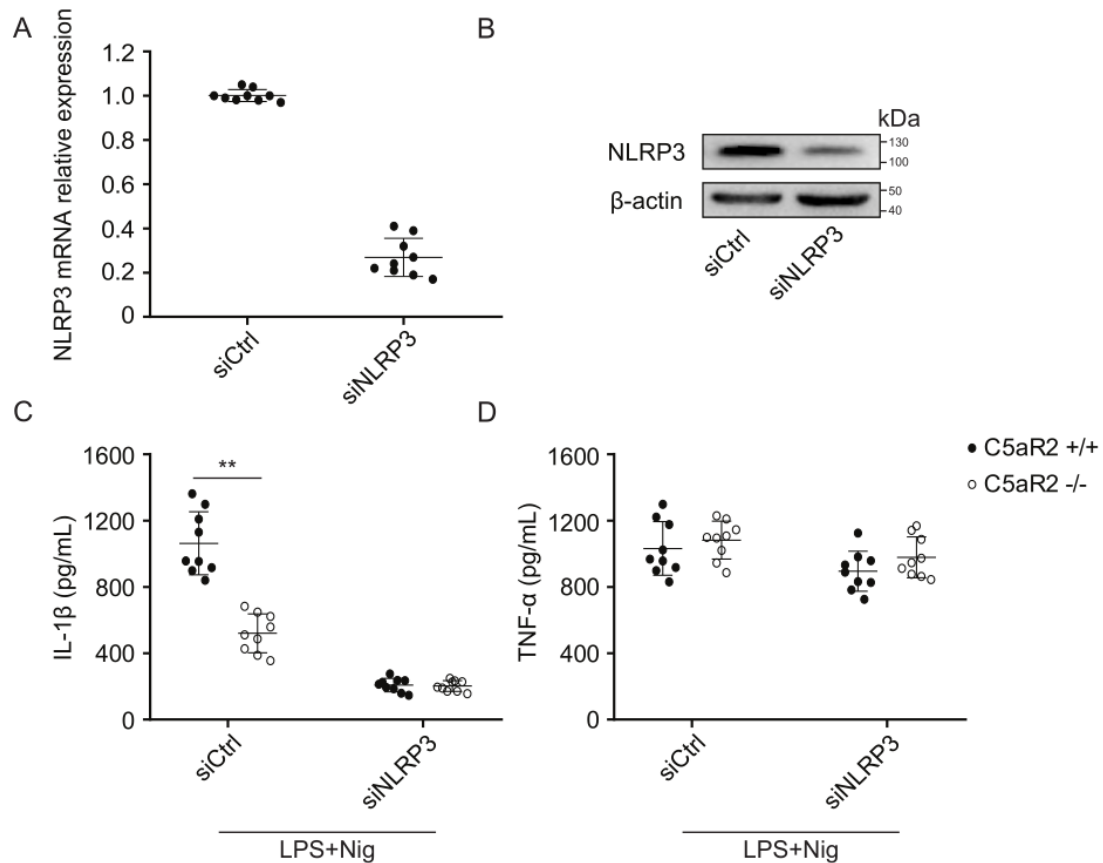

**Figure S1. NLRP3 is required for C5aR2-mediated NLRP3 inflammasome activation.**

Peritoneal macrophages collected from *C5aR2*<sup>+/+</sup> and *C5aR2*<sup>-/-</sup> mice were transfected with siNLRP3 or siCtrl 48 h before priming with LPS for 3 h and stimulation with Nigericin for 1 h. Total RNA (A) and protein (B) were extracted and subjected to Q-PCR and Western blot analysis of NLRP3 expression. Cell supernatants were analyzed by ELISA for IL-1 $\beta$  (C) and TNF- $\alpha$  (D). siCtrl: the scrambled negative control siRNA. The results represent the mean  $\pm$ S.D. of three independent experiments performed in triplicate (A, C, D). Two-tailed Student's *t* test was used (C). For Western blot analysis, data are representative of three independent experiments (B).

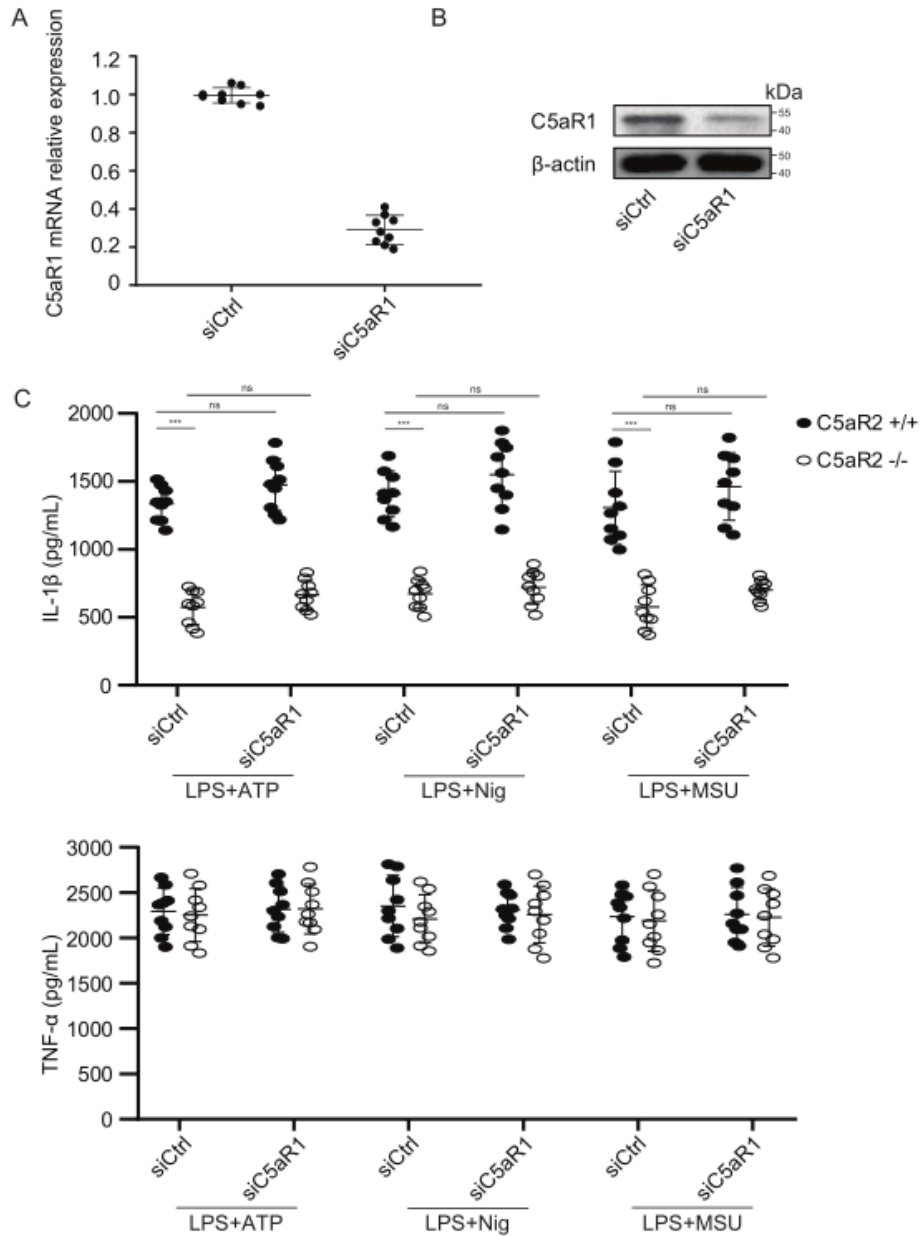

**Figure S2. Comparison of C5aR1 and C5aR2's role in NLRP3 inflammasome activation.** Peritoneal macrophages collected from *C5aR2*<sup>+/+</sup> and *C5aR2*<sup>-/-</sup> mice were transfected with siC5aR1 or siCtrl 48 h before priming with LPS for 3 h and stimulation with ATP or Nigericin for 1 h or MSU for 6 h. Total RNA (A) and protein (B) were extracted and subjected to Q-PCR and Western blot analysis of C5aR1 expression. Cell supernatants were analyzed by ELISA for IL-1 $\beta$  and TNF- $\alpha$  (C). siCtrl: the scrambled negative control siRNA. The results represent the mean  $\pm$  S.D. of three independent experiments performed in triplicate (A, C). Two-tailed Student's *t* test was used (C); ns, not significant. For Western blot analysis, data are representative of three independent experiments (B).

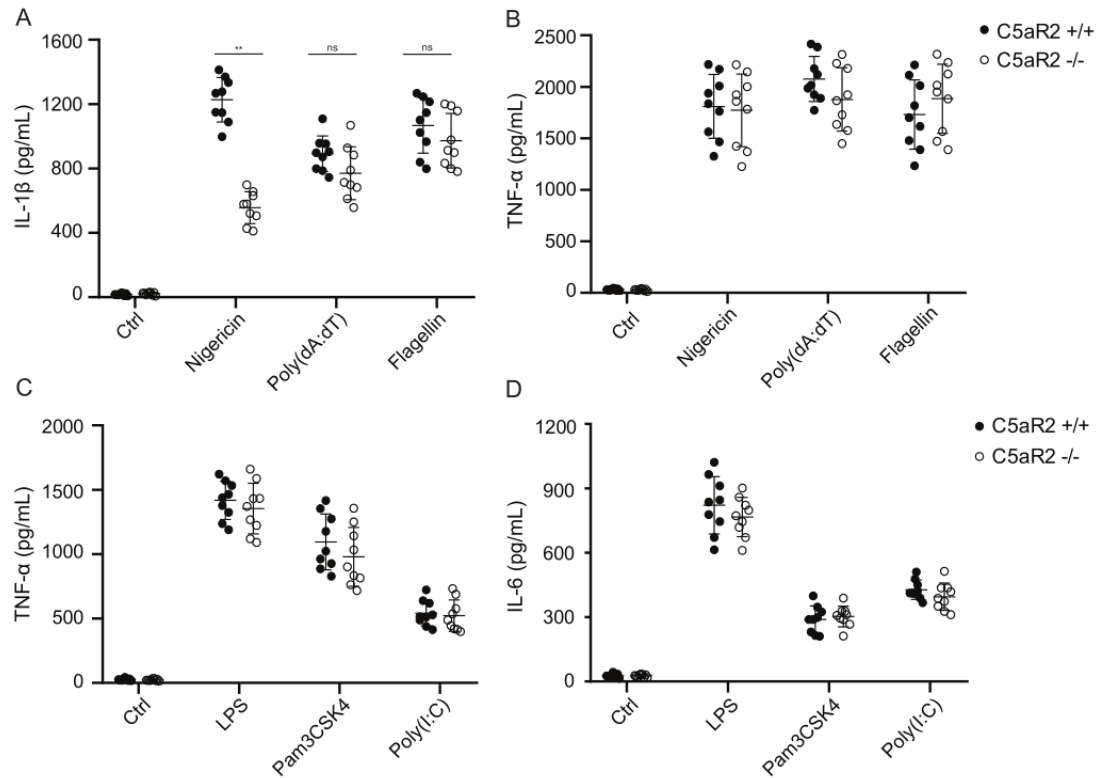

**Figure S3. Comparison of C5aR2's role in various inflammasomes and TLRs signaling.** (A, B) The peritoneal macrophages from *C5aR2*<sup>+/+</sup> and *C5aR2*<sup>-/-</sup> mice were primed with LPS and stimulated with NLRP3 agonist (Nigericin), AIM2 agonist (Poly (dA:dT)) and NLRC4 agonist (Flagellin) respectively. Cell supernatants were analyzed by ELISA for IL-1 $\beta$  (A) and TNF- $\alpha$  (B). (C, D) The peritoneal macrophages from *C5aR2*<sup>+/+</sup> and *C5aR2*<sup>-/-</sup> mice were treated with LPS, Pam3CSK4 and Poly (I:C) to activate TLR4, TLR2 and TLR3 signaling, respectively. Cell supernatants were analyzed by ELISA for TNF- $\alpha$  (C) and IL-6 (D). The results represent the mean  $\pm$  S.D. of three independent experiments performed in triplicate (A-D). Two-tailed Student's *t* test was used (A); ns, not significant.

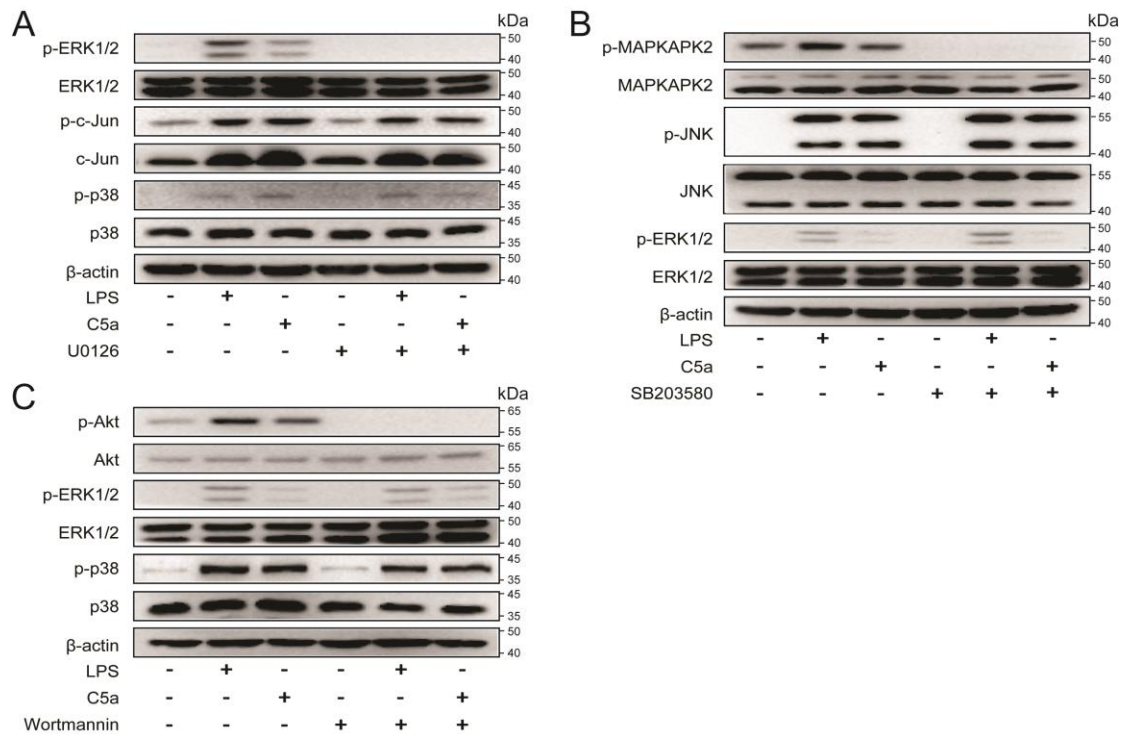

**Figure S4. Determination of the specificity of U0126, SB203580 and Wortmannin.**

Peritoneal macrophages from WT mice were treated with U0126, SB203580 or Wortmannin 1 h before stimulation with LPS or C5a for 3 h. Total protein were extracted and subjected to Western blot analysis of the phosphorylation of target and none-target proteins. The MEK/ERK inhibitor U0126 could directly suppress the phosphorylation of ERK1/2 without affecting the activation of c-Jun and p38 (A). The p38 MAPK inhibitor SB203580 could directly inhibit the phosphorylation of MAPKAPK2 without influencing the activation of JNK and ERK1/2 (B). The PI3K/Akt inhibitor Wortmannin could directly suppress the phosphorylation of Akt without interfering the activation of ERK1/2 and p38 (C). Data are representative of three independent experiments.

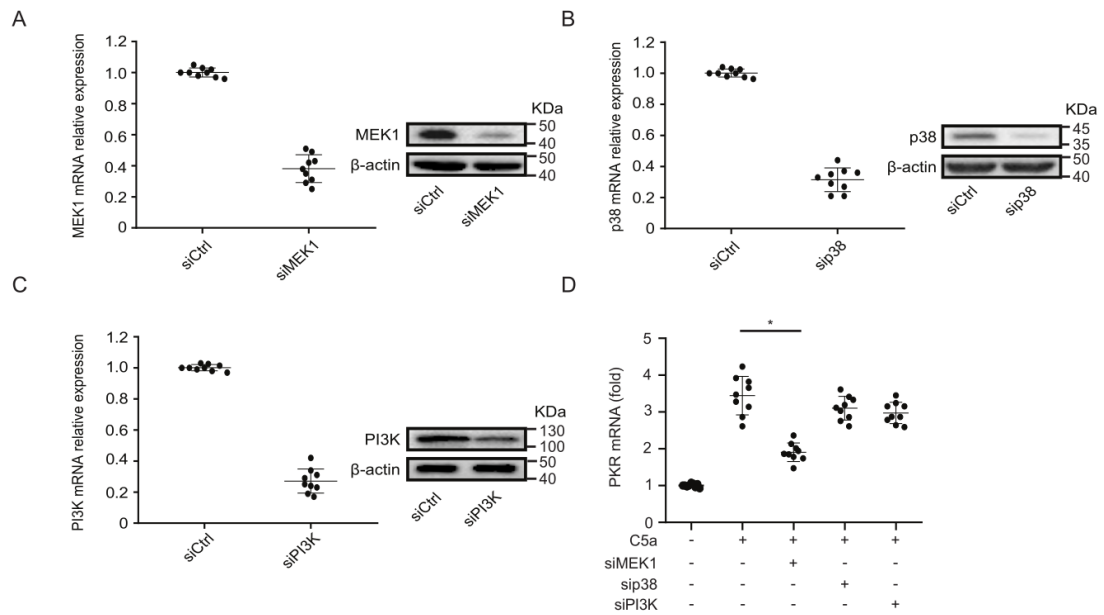

**Figure S5. Knockdown of MEK1 reduces the expression of PKR following C5a treatment.** Peritoneal macrophages from WT mice were transfected with siMEK1, sip38, siPI3K or siCtrl 48 h before challenge of C5a (1  $\mu$ g/mL) for 3 h. Total RNA and protein were extracted and subjected to Q-PCR and Western blot analysis of MEK1 (A), p38 (B), PI3K (C) and PKR (D) expression. siCtrl: the scrambled negative control siRNA. The results represent the mean  $\pm$ S.D. of three independent experiments performed in triplicate (A-D). Two-tailed Student's *t* test was used (D). For Western blot analysis, data are representative of three independent experiments (A-C).
